# Supplementary material for: Differential dephosphorylation of CTP:phosphocholine cytidylyltransferase upon translocation to nuclear membranes and lipid droplets
Source: PubMed Central journal article supplement — Mol Biol Cell. 2020 May 1;31(10):1047–59. doi: 10.1091/mbc.E20-01-0014 (PMC7346725; doi:10.1091/mbc.e20-01-0014), 2020-05-01
Supplement: mbc-31-1047-s001.pdf [file mbc-31-1047-s001.pdf]

# Supplemental Materials

*Molecular Biology of the Cell*

Yue et al.

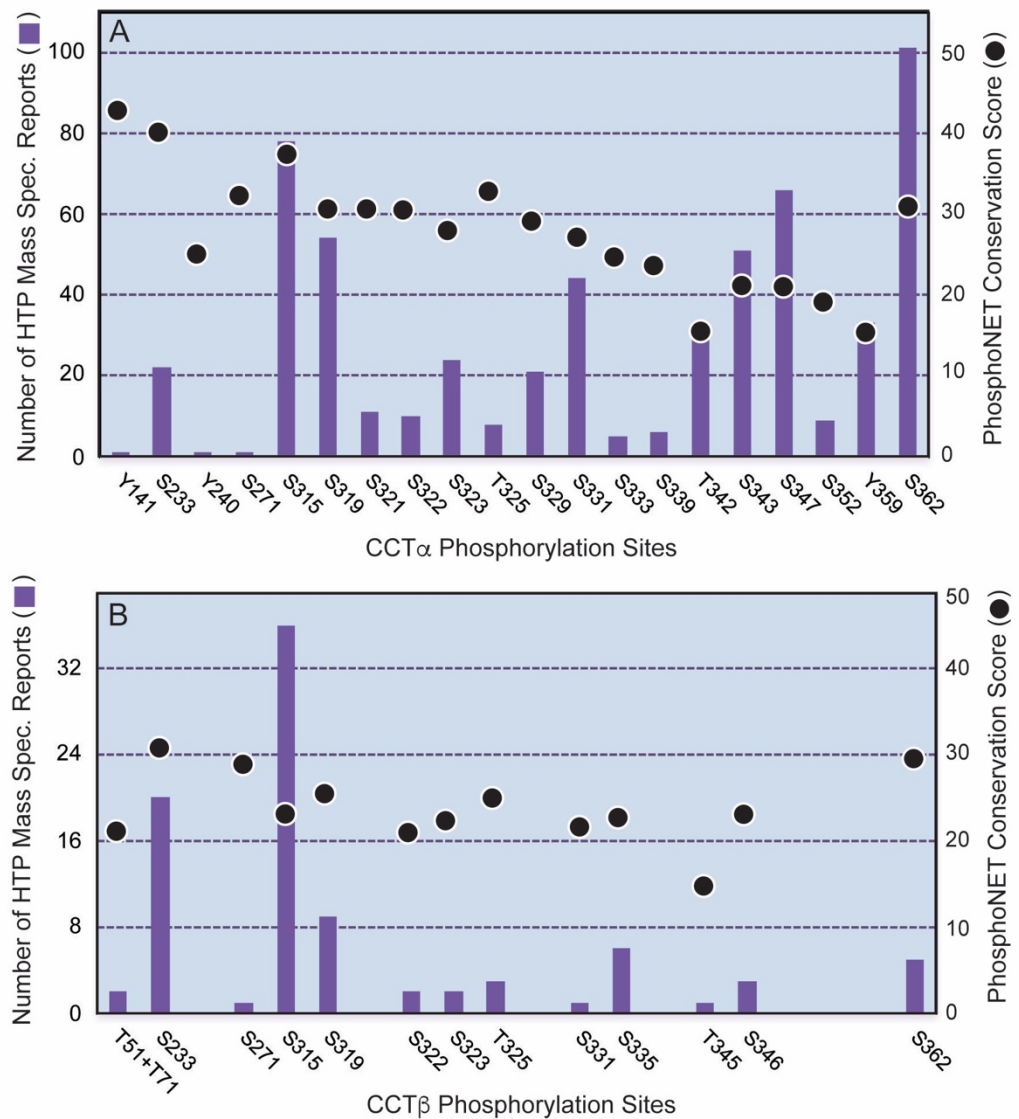

**SUPPLEMENTAL FIGURE S1.** Mass spectrometry frequency and conservation of human CCT $\alpha$  and CCT $\beta$  phosphorylation sites. The distribution and number of separate high throughput (HTP) mass spectrometry reports of phosphorylation sites listed for human CCT $\alpha$  (**A**) and CCT $\beta$  (**B**) on the PhosphositePlus ([www.phosphosite.org](http://www.phosphosite.org)) website (Hornbecker *et al.*, 2015) was determined (August 31, 2019). The conservation score (% retention in the analogous CCT phosphosites of 24 diverse species from human to red bread mold) was determined from the PhosphoNET ([www.phosphonet.ca](http://www.phosphonet.ca)) website Evolutionary module.

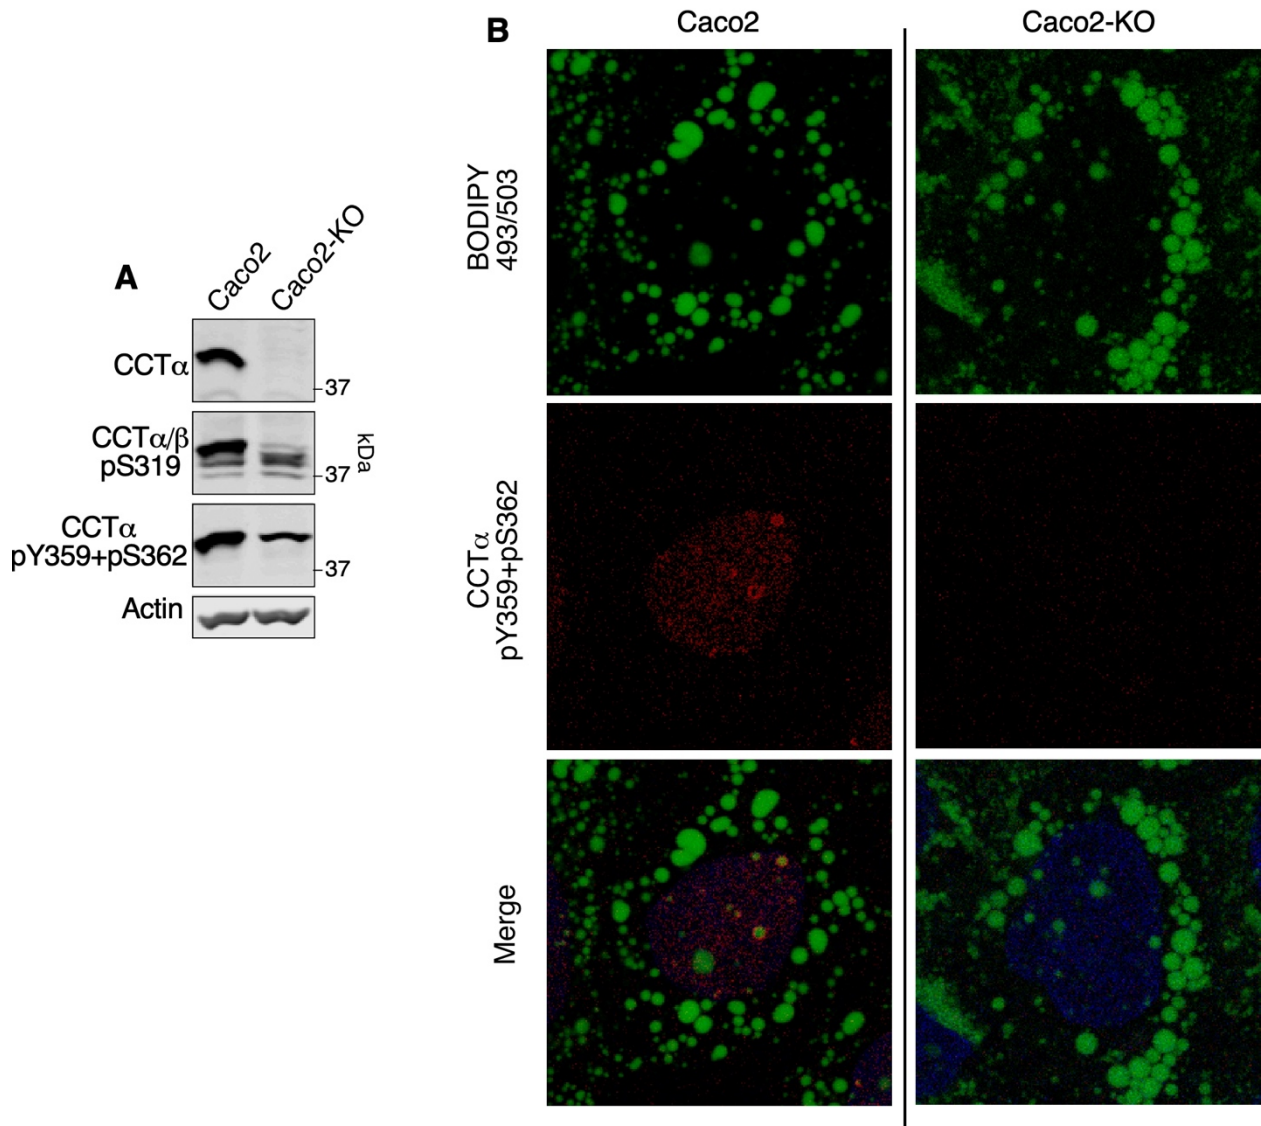

**SUPPLEMENTAL FIGURE S2.** Specificity of phosphosite-specific antibodies for human CCT $\alpha$ . (A) Lysates from Caco2 and Caco2 CCT $\alpha$  knockout cells (Caco2-KO) were immunoblotted with anti-CCT $\alpha/\beta$ -pS319, anti-CCT $\alpha$ -pY359+pS362 and anti-CCT $\alpha$ . (B) CaCo2 and CaCo2-KO cells were immunostained with anti-CCT $\alpha$ -pY359+pS362, and LDs and nuclei were visualized with BODIPY 493/503 and DAPI, respectively. Images are confocal sections (1  $\mu$ m).

Yue et al. Supplemental Figure S3

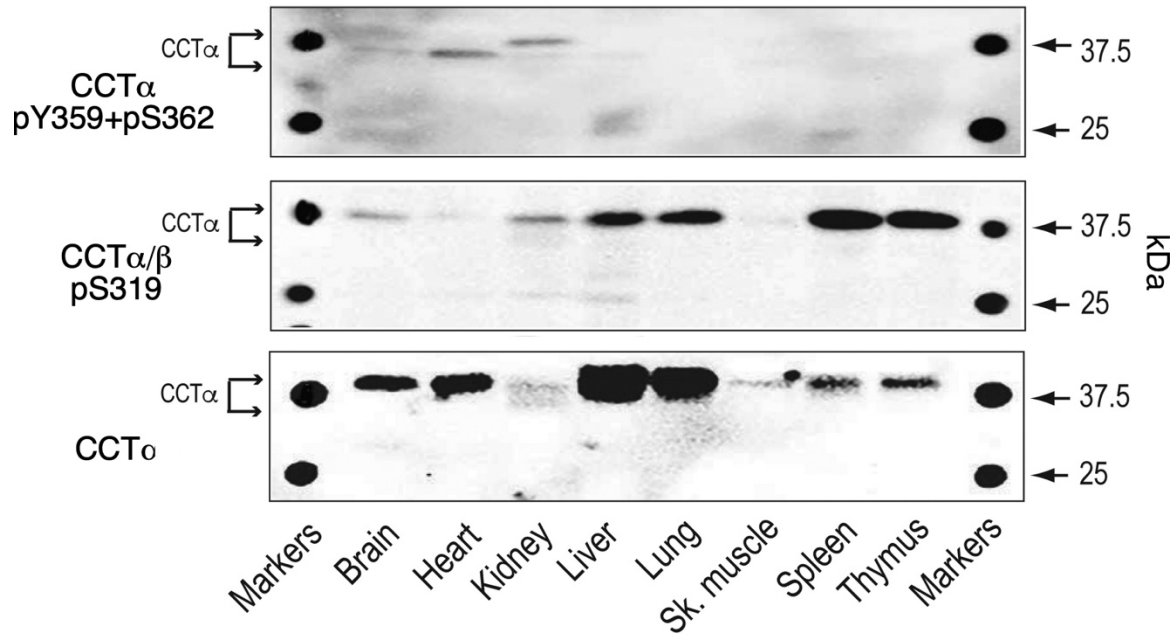

**SUPPLEMENTAL FIGURE S3.** Analysis of CCT $\alpha$  expression and phosphorylation in mouse tissues. Mouse tissue lysates ( $\sim 40 \mu\text{g}$  per lane) were resolved by SDS-PAGE, transferred to nitrocellulose membranes, and probed with anti-CCT $\alpha/\beta$ -pS319, anti-CCT $\alpha$ -pY359+pS362 and anti-CCT $\alpha$ .

Yue et al. Supplemental Figure S4

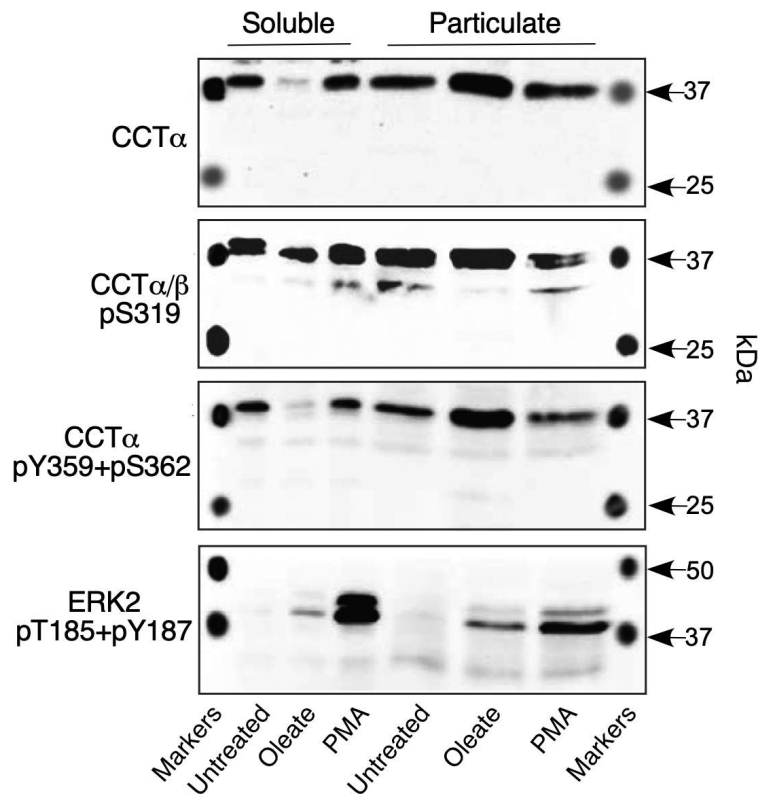

**SUPPLEMENTAL FIGURE S4.** Phosphorylation status and subcellular localization of CCT $\alpha$  in oleate- and phorbol ester-treated HeLa cells. Serum-maintained HeLa cells were untreated or treated with 1 mM sodium oleate for 20 minutes or 20 ng/ml PMA for 15 min. Cells were homogenized and ultracentrifuged at 90,000 x g for 30 min in detergent-free buffer. The supernatant (soluble fraction) was removed and the pellet was re-homogenized in buffer containing 1% Triton-X100 and subjected to ultracentrifugation to recover the detergent solubilized supernatant (particulate fraction). Fractions (25  $\mu$ g protein per lane) were resolved by SDS-PAGE, transferred to nitrocellulose membranes, and probed with the following primary anti-CCT $\alpha/\beta$ -pS319, anti-CCT $\alpha$ -p-Y359+pS362; anti-CCT $\alpha$  P-domain pan-specific; and anti-ERK2-pT185 +pY187.

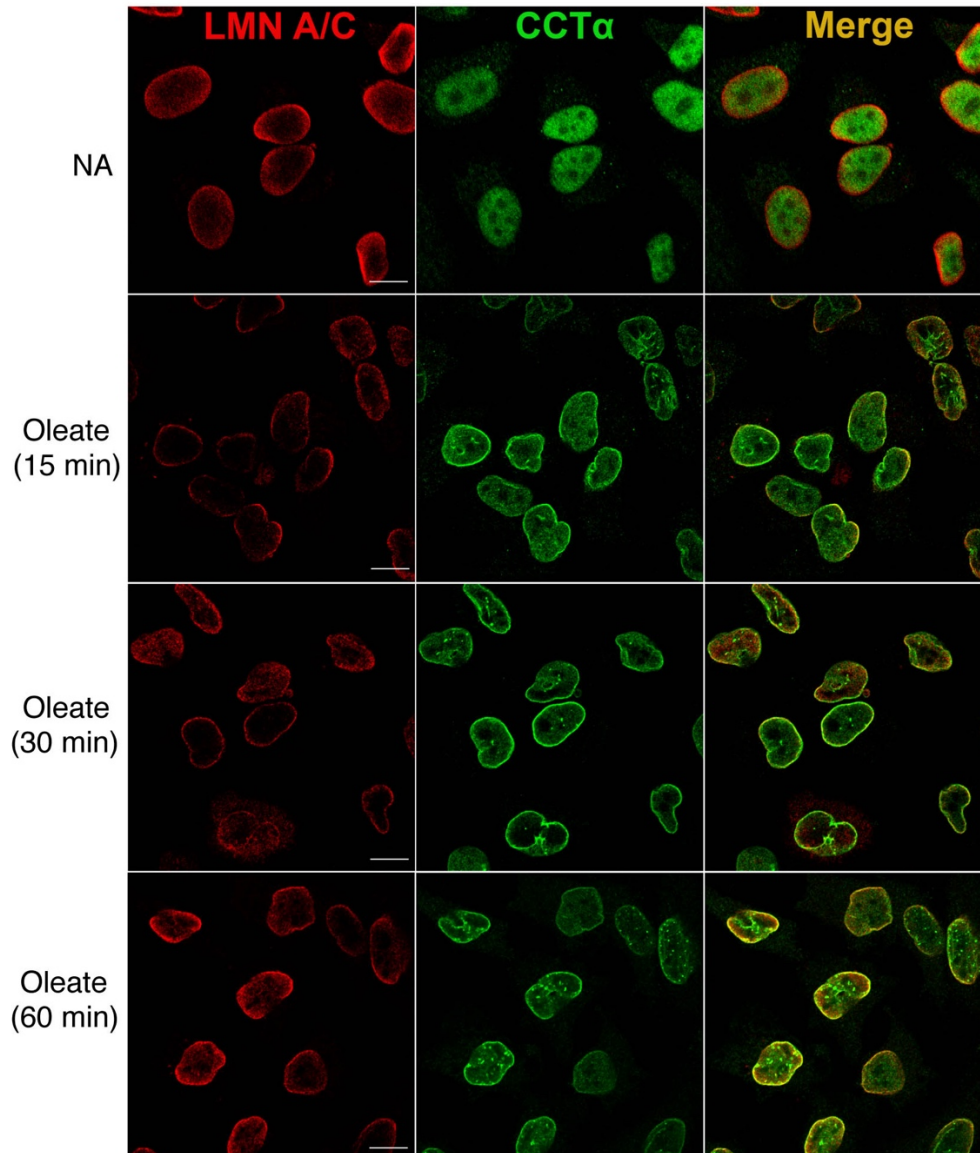

**SUPPLEMENTAL FIGURE S5.** Oleate treatment induces CCT $\alpha$  translocation from the nucleoplasm to the nuclear envelope in HeLa cells. Cells were cultured in serum-free DMEM and 500  $\mu$ M oleate/BSA for 0 to 60 min prior to fixation, permeabilization and probing with primary antibodies for CCT $\alpha$  and LMNA/C, followed by AlexaFluor-488 and AlexaFluor-594 secondary antibodies. All images are 0.8  $\mu$ m confocal sections. Bar, 10  $\mu$ m.

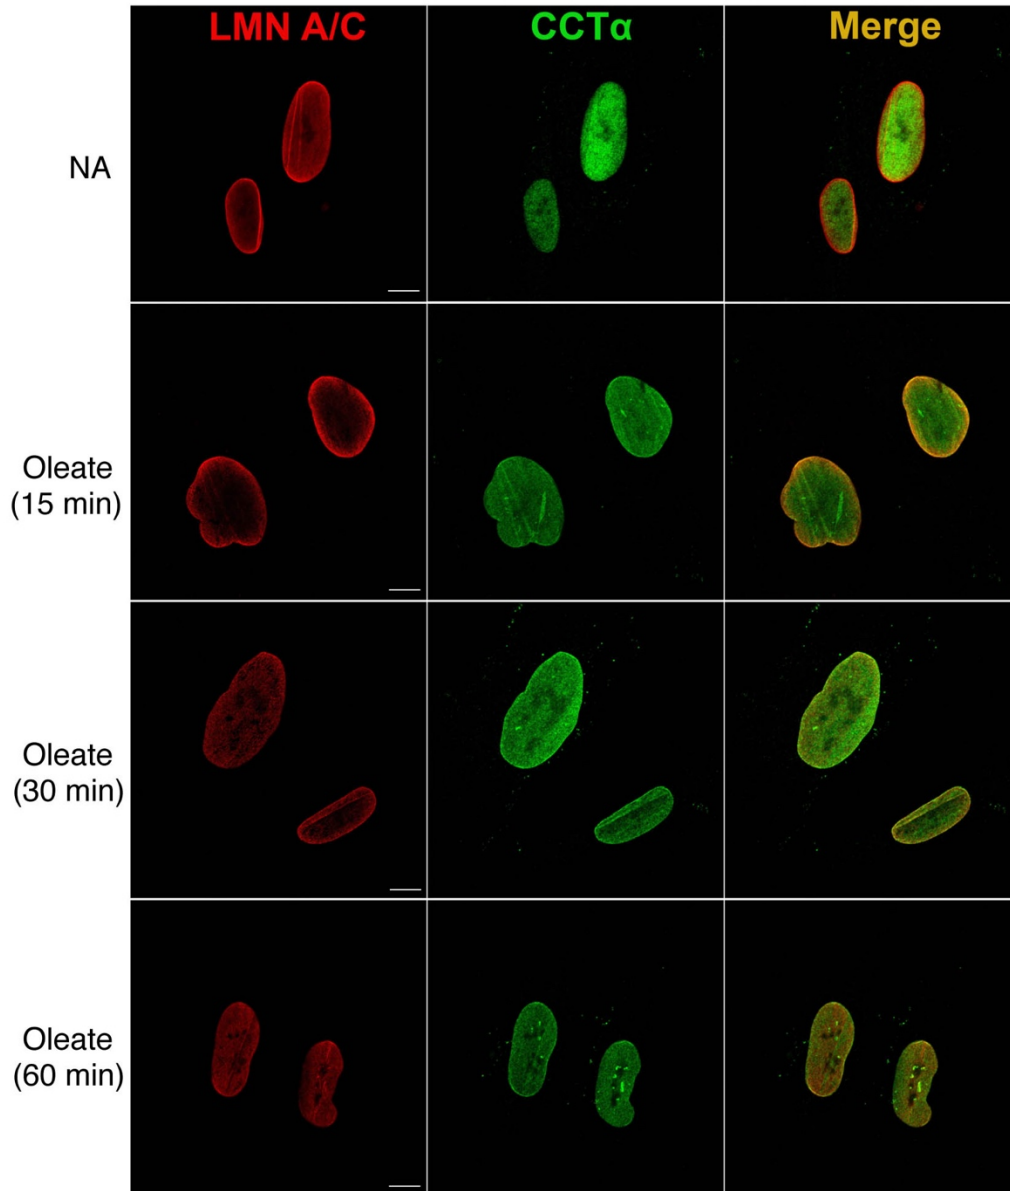

**SUPPLEMENTAL FIGURE S6.** Oleate treatment induces CCT $\alpha$  translocation from the nucleoplasm to the nuclear envelope in F8 human fibroblasts. Cells were cultured in serum-free DMEM and 300  $\mu$ M oleate/BSA for 0 to 60 min prior to fixation, permeabilization and probing with primary antibodies for CCT $\alpha$  and LMNA/C and AlexaFluor-488 and AlexaFluor-594 secondary antibodies, respectively. All images are 0.8  $\mu$ m confocal sections. Bar, 10  $\mu$ m.



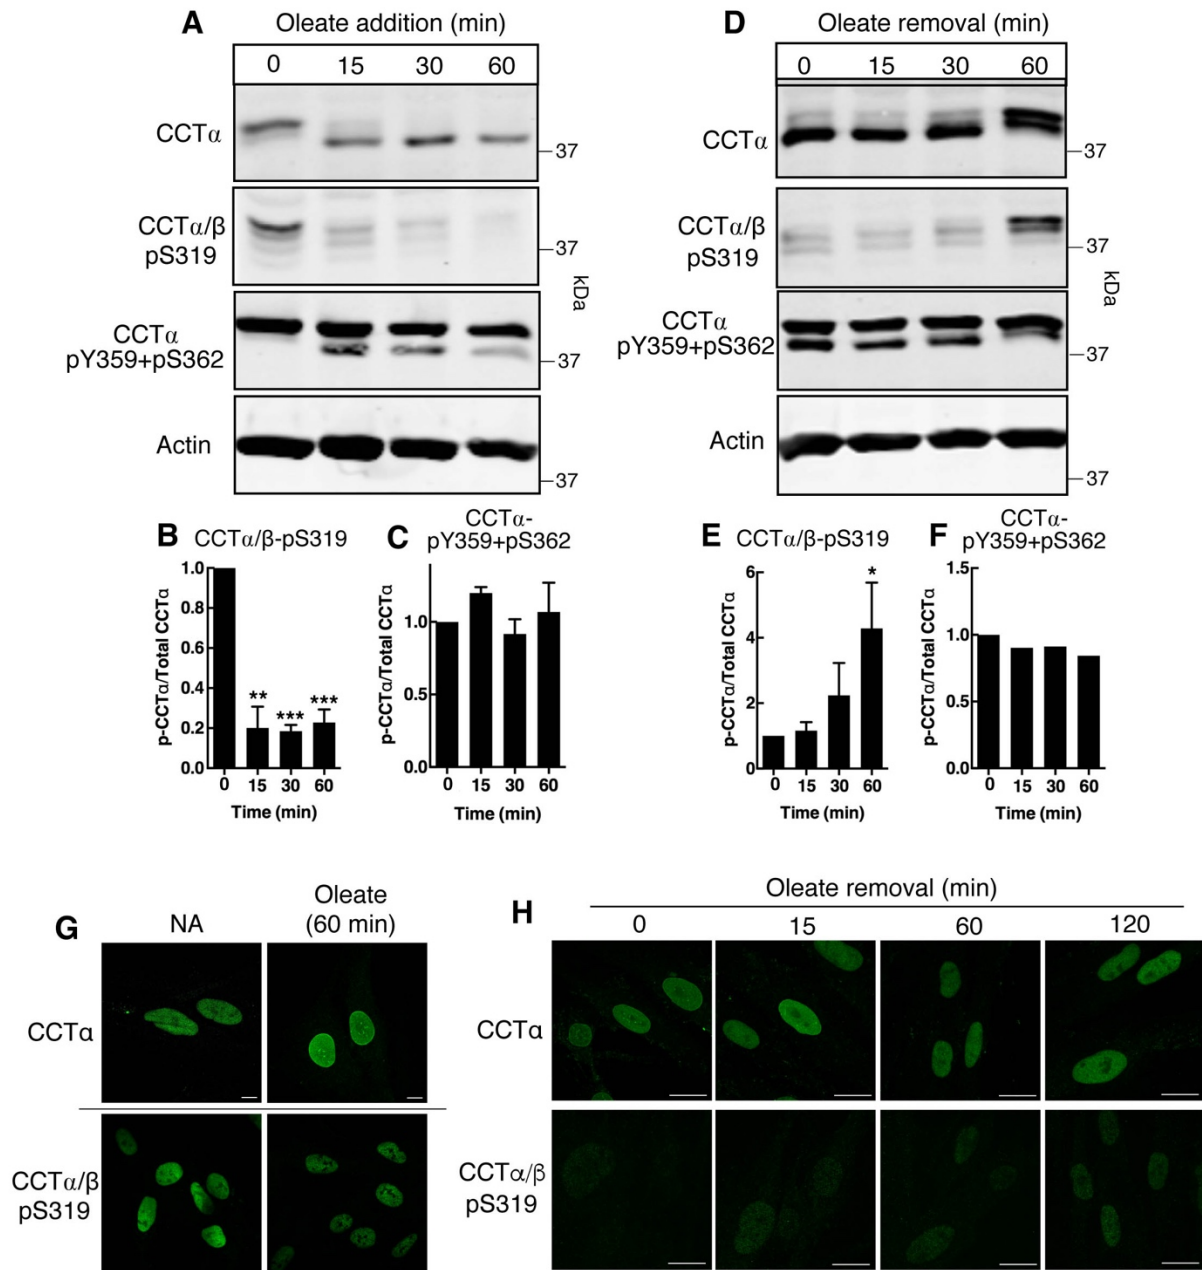

**SUPPLEMENTAL FIGURE S7.** Oleate treatment of human skin fibroblasts induces reversible dephosphorylation of CCT $\alpha$  S319 but not Y359 or S362. (A-C) Total cell lysates prepared from F8 human fibroblasts cultured in serum-free DMEM containing 500  $\mu$ M oleate/BSA were immunoblotted with CCT $\alpha/\beta$ -pS319, CCT $\alpha$ -pY359+pS362, CCT $\alpha$  or actin antibodies. Phosphorylation of S315 (B) and Y359+S362 (C) was quantified relative



to total CCT $\alpha$  protein. (D-F) Fibroblasts were cultured in serum-free DMEM with 300  $\mu$ M oleate/BSA for 30 min before replacing with serum-free DMEM for the indicated times. Total cell lysates were immunoblotted as described in panel A, and phosphorylation of S315 (E) and Y359+S362 (F) was quantified relative to total CCT $\alpha$  protein. Results are the mean and SEM of 3 experiments. Statistical comparisons were made with 0 h controls. (G) Fibroblasts cultured in serum-free DMEM with 300  $\mu$ M oleate/BSA for 30 min were immunostained with CCT $\alpha$  and CCT $\alpha/\beta$ -pS319 antibodies. (G) Fibroblasts were cultured in serum-free DMEM with 300  $\mu$ M oleate/BSA for 30 min. Oleate-containing media was then replaced with serum-free DMEM and cells were incubated for the indicated times before immunostaining with CCT $\alpha$  and CCT $\alpha/\beta$ -pS319 antibodies. Confocal images are shown (0.8  $\mu$ m sections). Bar, 10  $\mu$ m.

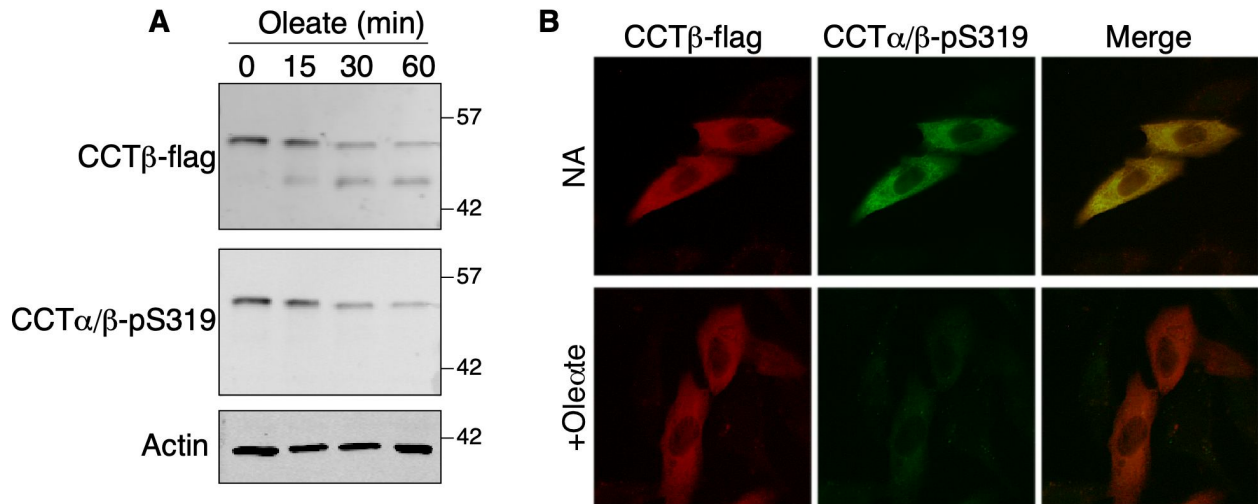

**SUPPLEMENTAL FIGURE S8.** Oleate-induced dephosphorylation of S319 in human CCT $\beta$ . (A) CHO-MT58 cells transiently expressing human CCT $\beta$ -Flag were treated with 300  $\mu$ M oleate for up to 60 min. Total cell lysates were immunoblotted with Flag monoclonal, CCT $\alpha/\beta$ -pS319 and actin. (B) Cells expressing CCT $\beta$ -Flag and treated with oleate (300  $\mu$ M) for 60 min were immunostained with anti-Flag and anti-CCT $\alpha/\beta$ -pS319, followed by AlexaFluor-594 and -488-conjugated secondary antibodies, respectively.

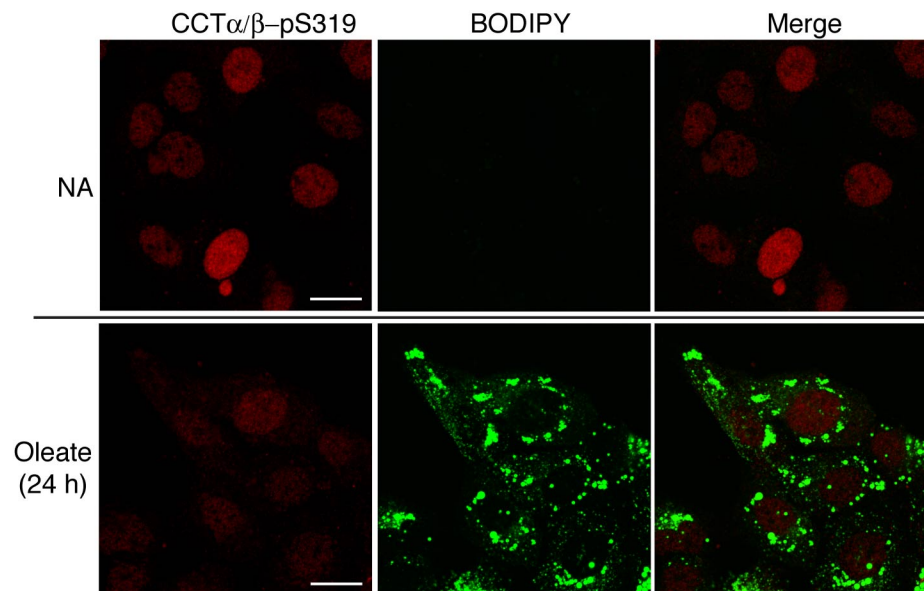

**SUPPLEMENTAL FIGURE S9.** U2OS cells treated with oleate have reduced nuclear CCT $\alpha$  S319 phosphorylation. U2OS cells were cultured in medium with no additions (NA) or in the presence of 300  $\mu$ M oleate/BSA for 24 h, fixed and immunostained with primary CCT $\alpha/\beta$ -S319 and secondary Alexafluor-594 antibodies. Nuclear lipid droplets were visualised with BODIPY493/503. Confocal images are shown (0.8  $\mu$ m sections). Bar, 20  $\mu$ m.
